# Supplementary material for: Natural and Artificial Sweeteners and High Fat Diet Modify Differential Taste Receptors, Insulin, and TLR4-Mediated Inflammatory Pathways in Adipose Tissues of Rats
Source: PubMed Central journal article supplement (PMC6520815; doi:10.3390/nu11040880), 2019-04-19
Supplement: nutrients-11-00880-s001.pdf [file nutrients-11-00880-s001.pdf]

Table S1: Primers used in real time PCR.

| <b>Gen</b>                     | <b>Forward sequence (5'-3')</b> | <b>Reverse sequence (5'-3')</b> |
|--------------------------------|---------------------------------|---------------------------------|
| <i>rgip</i>                    | G TTCCTTCCAGGGTTTCCTC           | GACCTCATCTCCAGGCACAT            |
| <i>tlr-4</i>                   | G TGCCCCGCTTTCAGCTTTG           | GTGCCTCCCCAGAGCATTGT            |
| <i>tnf-<math>\alpha</math></i> | A TGTGGAAGTGGCAGAGGAG           | GCCATGGAAGTGTGAGAGG             |
| <i>glut-4</i>                  | G GGCTGTGAGTGAGTGCTTTC          | CAGCGAGGCAAGGCTAGA              |
| <i>srebp-1c</i>                | C GTTGTAAGTGCAGCCACACT          | AGTGGTACTGTGGCCAGGAT            |
| <i>ppary</i>                   | C GACCTGGAAGTCCAAGTAC           | ATCTGCTGCATCTGCTTG              |
| <i>adiponectin</i>             | G CCTCTACGATACGGTCCAA           | TGCATTCTGACCTTCACCAC            |
| <i>leptin</i>                  | T TTCACACACGCAGTCGGTATC         | GGTCTGGTCCATCTTGACAAA           |
| <i>ucp-1</i>                   | G CCTCTACGATACGGTCCAA           | TGCATTCTGACCTTCACCAC            |
| <i>bcat2</i>                   | A GGCACTGCTTGTGAGGTCT           | CTCCCTAACGTACACACGA             |
| <i>bckdh</i>                   | A AGGAGCGTCACTTCGTAC            | AGAGGTTGGTGTGGAGATGG            |
| <i>36b4</i>                    | C GACCTGGAAGTCCAAGTAC           | ATCTGCTGCATCTGCTTG              |
| <i>cyclophilin</i>             | C GTGGGCTCCGTTGTCTT             | TGACTTTAGGTCCCTTCTTATCG         |
